# Supplementary material
Source: PubMed Central journal article supplement (PMC9994181)

**Note to readers with disabilities:** *EHP* strives to ensure that all journal content is accessible to all readers. However, some figures and Supplemental Material published in *EHP* articles may not conform to [508 standards](#) due to the complexity of the information being presented. If you need assistance accessing journal content, please contact [ehp508@niehs.nih.gov](mailto:ehp508@niehs.nih.gov). Our staff will work with you to assess and meet your accessibility needs within 3 working days.

### **Supplemental Material**

#### **Long-Term Exposure to Nitrate and Trihalomethanes in Drinking Water and Prostate Cancer: A Multicase–Control Study in Spain (MCC-Spain)**

Carolina Donat-Vargas, Manolis Kogevinas, Gemma Castaño-Vinyals, Beatriz Pérez-Gómez, Javier Llorca, Mercedes Vanaclocha-Espí, Guillermo Fernandez-Tardon, Laura Costas, Nuria Aragonés, Inés Gómez-Acebo, Victor Moreno, Marina Pollan, and Cristina M. Villanueva

#### **Table of Contents**

**Table S1.** Characteristics and drinking-water contaminant exposures of the participants excluded from the study population from a Multicase–Control Study in Spain (MCC-Spain) (N=653).

**Table S2.** Mean (standard deviation) of age, adherence to WCRF/AICR cancer prevention score, red and processed meat consumption, fiber intake, total fruit and vegetables intake, vitamin C intake and vitamin E intake across waterborne ingested nitrate tertiles and by case-control status. Multicase–Control Study in Spain (MCC-Spain): 629 prostate cancer cases, 824 controls (N=1,453).

**Figure S1.** Geographic distribution of the water zones with data on nitrate and THM levels included in the study during the exposure window. Multicase–Control Study in Spain (MCC-Spain): 697cases, 927 controls (N= 1,624).

**Figure S2.** Spearman's rank correlation coefficients between drinking-water exposures.

**Additional File-** Excel Document

**Supplemental Table 1.** Characteristics and drinking-water contaminant exposures of the participants excluded from the study population from a Multicase–Control Study in Spain (MCC-Spain) (N=653)

|                                                        | <b>Controls</b><br>% or mean (SD) | <b>Cases</b><br>% or mean (SD) |
|--------------------------------------------------------|-----------------------------------|--------------------------------|
| <b>n</b>                                               | 354                               | 299                            |
| <b>Characteristics</b>                                 |                                   |                                |
| Age (years)                                            | 66.4 (9.2)                        | 66.2 (7.7)                     |
| Educational level (%)                                  |                                   |                                |
| Less than primary                                      | 20.3                              | 25.4                           |
| Primary school                                         | 31.4                              | 37.1                           |
| Secondary school                                       | 26.3                              | 20.4                           |
| University                                             | 22.0                              | 17.1                           |
| Family history of prostate cancer (first degree) (%)   | 15.0                              | 20.7                           |
| Smoking status (%)                                     |                                   |                                |
| Never                                                  | 29.9                              | 26.1                           |
| Former                                                 | 55.4                              | 56.2                           |
| Current smoker                                         | 14.7                              | 17.7                           |
| WCRF/AICR cancer prevention score                      | 3.4 (0.9)                         | 3.2 (0.9)                      |
| Intake of red and processed meat (g/day)               | 78.1 (44.0)                       | 80.5 (52.4)                    |
| Intake of total fiber (g/day)                          | 11.5 (3.9)                        | 10.9 (3.4)                     |
| Intake of fruit and vegetables (g/day)                 | 519 (310)                         | 474 (250)                      |
| Intake of vitamin C (mg/day)                           | 156 (101)                         | 144 (77)                       |
| Intake of vitamin E (mg/day)                           | 11.0 (7.0)                        | 10.5 (6.2)                     |
| Recruitment area (%)                                   |                                   |                                |
| Asturias                                               | 13.6                              | 2.7                            |
| Barcelona                                              | 49.7                              | 34.4                           |
| Cantabria                                              | 16.1                              | 24.7                           |
| Madrid                                                 | 16.4                              | 25.4                           |
| Valencia                                               | 4.2                               | 12.7                           |
| <b>Drinking-water contaminant exposures</b>            |                                   |                                |
| <i>Average concentrations in residential tap water</i> |                                   |                                |
| Nitrate (mg/L)                                         | 7.4 (4.2)                         | 7.3 (4.2)                      |
| Brominated trihalomethane (µg/L)                       | 39.1 (36.5)                       | 29 (26.8)                      |
| Chloroform (µg/L)                                      | 18.5 (8.9)                        | 18.6 (9.8)                     |
| <i>Daily average waterborne ingestion</i>              |                                   |                                |
| Nitrate (mg/day)                                       | 11 (9.6)                          | 12.2 (10.1)                    |
| Brominated trihalomethane (µg/day)                     | 25.8 (43.7)                       | 18.5 (34.7)                    |
| Chloroform (µg/day)                                    | 15.6 (20.3)                       | 14.6 (23.3)                    |

**Supplemental Table 2.** Mean (standard deviation) of age, adherence to WCRF/AICR cancer prevention score, red and processed meat consumption, fiber intake, total fruit and vegetables intake, vitamin C intake and vitamin E intake across waterborne ingested nitrate tertiles and by case-control status. Multicase–Control Study in Spain (MCC-Spain): 629 prostate cancer cases, 824 controls (N=1,453)\*.

| Waterborne ingested nitrate (tertiles)   | <5.5 mg/day      |               | 5.5–13.8 mg/day  |               | >13.8 mg/day     |               |
|------------------------------------------|------------------|---------------|------------------|---------------|------------------|---------------|
|                                          | Controls (n=277) | Cases (n=192) | Controls (n=273) | Cases (n=186) | Controls (n=274) | Cases (n=251) |
| Age (years)                              | 67.2 (8.3)       | 65.9 (7.3)    | 66.3 (8.6)       | 66.7 (7.5)    | 66.4 (7.9)       | 65.5 (7.1)    |
| WCRF/AICR score                          | 3.4 (1.0)        | 3.3 (0.9)     | 3.3 (1.0)        | 3.3 (0.9)     | 3.3 (1.0)        | 3.4 (1.0)     |
| Intake of red and processed meat (g/day) | 70.2 (36.9)      | 75.7 (37.6)   | 73.5 (37.2)      | 74.3 (39.4)   | 76.3 (39.6)      | 80.2 (43.7)   |
| Intake of total fiber (g/day)            | 11.3 (4.0)       | 11.4 (3.7)    | 11.1 (3.7)       | 11.9 (3.9)    | 11.4 (3.6)       | 11.0 (3.2)    |
| Intake of fruit and vegetables (g/day)   | 483(262)         | 513 (227)     | 477 (308)        | 477 (258)     | 497 (258)        | 510 (250)     |
| Intake of vitamin C (mg/day)             | 149 (83)         | 154 (77)      | 147 (105)        | 146 (84)      | 147 (86)         | 151 (80)      |
| Intake of vitamin E (mg/day)             | 10.0 (4.5)       | 10.1 (4.5)    | 10.1 (5.5)       | 10.4 (5.3)    | 11.1 (6.2)       | 11.2 (5.6)    |

\*These analyses are performed excluding 171 subjects with missing data in the dietary variables.

WCRF/AICR cancer prevention score is based on The World Cancer Research Fund/American Institute for Cancer Research cancer prevention recommendations

**Supplemental Figure 1.** Geographic distribution of the water zones with data on nitrate and THM levels included in the study during the exposure window. Multicase–Control Study in Spain (MCC-Spain): 697cases, 927 controls (N= 1,624)

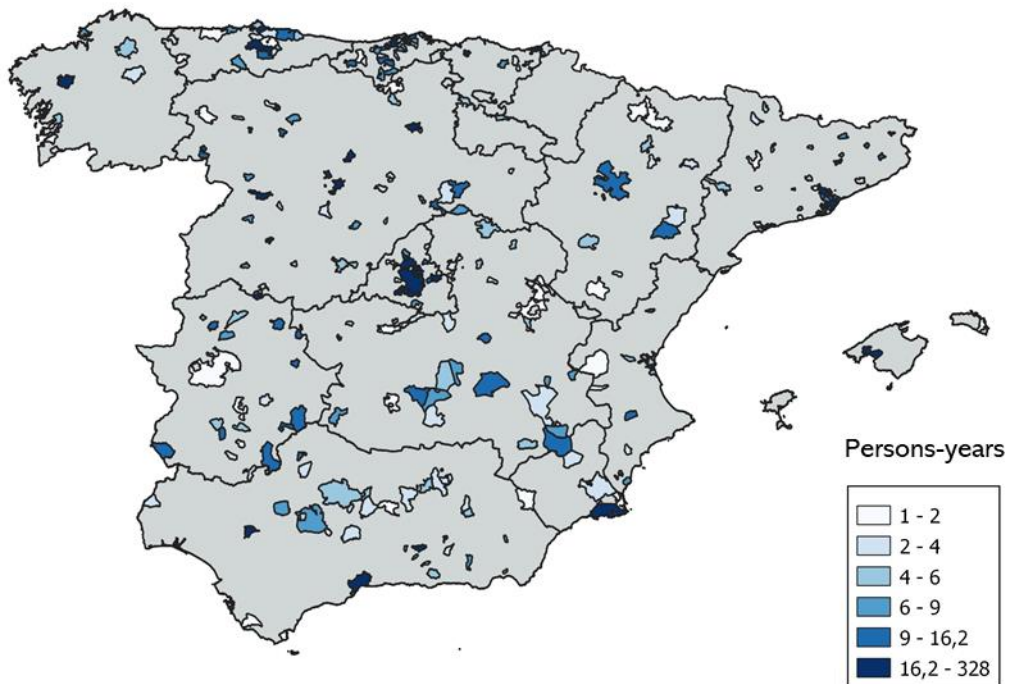

The intensity of the blue colour represents the number of person-years corresponding to each water zone. Corresponding numeric data can be found in **Excel Table S1**.

**Supplemental Figure 2.** Spearman's rank correlation coefficients between drinking-water exposures

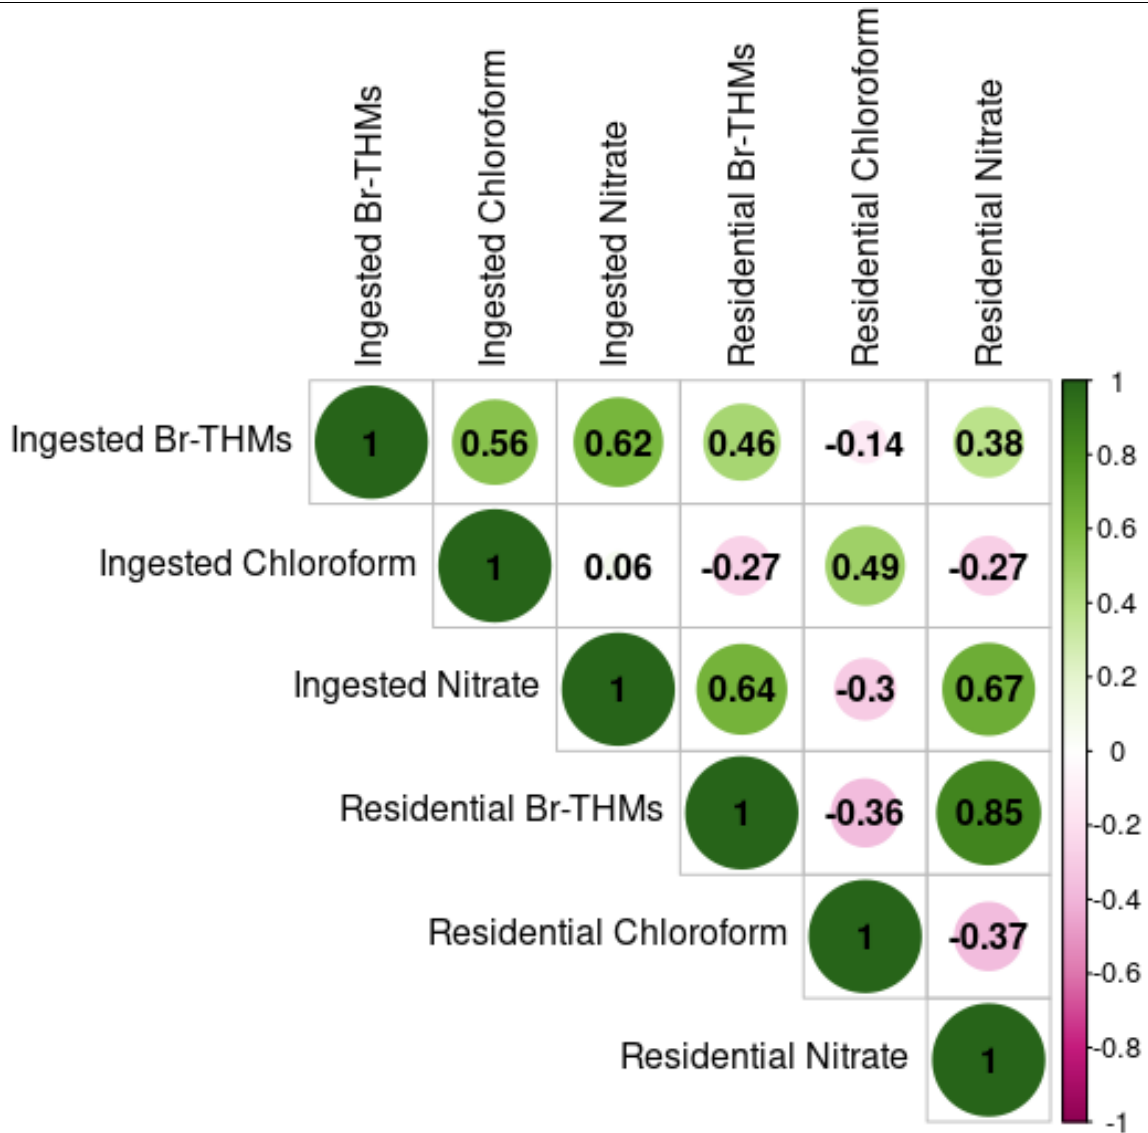

Supplement: ehp11391.s001.acco.pdf [file ehp11391.s001.acco.pdf]
