# Supplementary material
Source: PubMed Central journal article supplement (PMC9994181)
Supplement: ehp11391.smcontents.508.pdf [file ehp11391.smcontents.508.pdf]

**Note to readers with disabilities:** *EHP* strives to ensure that all journal content is accessible to all readers. However, some figures and Supplemental Material published in *EHP* articles may not conform to [508 standards](#) due to the complexity of the information being presented. If you need assistance accessing journal content, please contact [ehp508@niehs.nih.gov](mailto:ehp508@niehs.nih.gov). Our staff will work with you to assess and meet your accessibility needs within 3 working days.

### **Supplemental Material**

#### **Long-Term Exposure to Nitrate and Trihalomethanes in Drinking Water and Prostate Cancer: A Multicase–Control Study in Spain (MCC-Spain)**

Carolina Donat-Vargas, Manolis Kogevinas, Gemma Castaño-Vinyals, Beatriz Pérez-Gómez, Javier Llorca, Mercedes Vanaclocha-Espí, Guillermo Fernandez-Tardon, Laura Costas, Nuria Aragonés, Inés Gómez-Acebo, Victor Moreno, Marina Pollan, and Cristina M. Villanueva

#### **Table of Contents**

**Table S1.** Characteristics and drinking-water contaminant exposures of the participants excluded from the study population from a Multicase–Control Study in Spain (MCC-Spain) (N=653).

**Table S2.** Mean (standard deviation) of age, adherence to WCRF/AICR cancer prevention score, red and processed meat consumption, fiber intake, total fruit and vegetables intake, vitamin C intake and vitamin E intake across waterborne ingested nitrate tertiles and by case-control status. Multicase–Control Study in Spain (MCC-Spain): 629 prostate cancer cases, 824 controls (N=1,453).

**Figure S1.** Geographic distribution of the water zones with data on nitrate and THM levels included in the study during the exposure window. Multicase–Control Study in Spain (MCC-Spain): 697cases, 927 controls (N= 1,624).

**Figure S2.** Spearman's rank correlation coefficients between drinking-water exposures.

**Additional File-** Excel Document
